# Supplementary material for: The human hepatic cell line HepaRG as a possible cell source for the generation of humanized liver TK-NOG mice
Source: PubMed Central journal article supplement — Xenobiotica. 2013 Sep 25;44(2):146–53. doi: 10.3109/00498254.2013.836257 (PMC3906414; doi:10.3109/00498254.2013.836257), 2013-09-25
Supplement: XEN-44-146-s1.pdf [file XEN-44-146-s1.pdf]

## Xenobiotica

### Supplementary Table 1

#### TaqMan probe information

| Gene name | Gene description                                                | TaqMan Assay No. |
|-----------|-----------------------------------------------------------------|------------------|
| GAPDH     | glyceraldehyde-3-phosphate dehydrogenase                        | s99999905_m1     |
| ALB       | albumin                                                         | Hs99999922_s1    |
| CYP1A1    | cytochrome P450, family 1, subfamily A, polypeptide 1           | Hs00153120_m1    |
| CYP1A2    | cytochrome P450, family 1, subfamily A, polypeptide 2           | Hs00167927_m1    |
| CYP2A6    | cytochrome P450, family 2, subfamily A, polypeptide 6           | Hs00868409_s1    |
| CYP2B6    | cytochrome P450, family 2, subfamily B, polypeptide 6           | Hs03044634_m1    |
| CYP2C8    | cytochrome P450, family 2, subfamily C, polypeptide 8           | Hs00258314_m1    |
| CYP2C9    | cytochrome P450, family 2, subfamily C, polypeptide 9           | Hs00426397_m1    |
| CYP2C18   | cytochrome P450, family 2, subfamily C, polypeptide 18          | Hs00426400_m1    |
| CYP2C19   | cytochrome P450, family 2, subfamily C, polypeptide 19          | Hs00426380_m1    |
| CYP2D6    | cytochrome P450, family 2, subfamily D, polypeptide 6           | Hs00164385_m1    |
| CYP2E1    | cytochrome P450, family 2, subfamily E, polypeptide 1           | Hs00559368_m1    |
| CYP3A4    | cytochrome P450, family 3, subfamily A, polypeptide 4           | Hs00430021_m1    |
| CYP3A5    | cytochrome P450, family 3, subfamily A, polypeptide 5           | Hs00241417_m1    |
| UGT1A1    | UDP glucuronosyltransferase 1 family, polypeptide A1            | Hs02511055_s1    |
| UGT2B15   | UDP glucuronosyltransferase 2 family, polypeptide B15           | Hs00870076_s1    |
| ABCB1     | ATP-binding cassette, sub-family B (MDR/TAP), member 1          | Hs00184500_m1    |
| ABCB11    | ATP-binding cassette, sub-family B (MDR/TAP), member 11         | Hs00184824_m1    |
| ABCC2     | ATP-binding cassette, sub-family C (CFTR/MRP), member 2         | Hs00166123_m1    |
| ABCG2     | ATP-binding cassette, sub-family G (WHITE), member 2            | Hs01053790_m1    |
| SLC22A1   | solute carrier family 22 (organic cation transporter), member 1 | Hs00427552_m1    |
| SLC22A7   | solute carrier family 22 (organic anion transporter), member 6  | Hs00537914_m1    |
| SLC22A9   | solute carrier family 22 (organic anion transporter), member 7  | Hs00198527_m1    |
| SLCO1B1   | solute carrier family 22 (organic anion transporter), member 8  | Hs01056647_m1    |
| SLCO1B3   | solute carrier family 22 (organic anion transporter), member 9  | Hs00971064_m1    |
| NR1I2     | nuclear receptor subfamily 1, group I, member 2                 | Hs00243666_m1    |
| NR1I3     | nuclear receptor subfamily 1, group I, member 3                 | Hs00901571_m1    |
| NR1H4     | nuclear receptor subfamily 1, group H, member 4                 | Hs00231968_m1    |
